# Supplementary material for: Open-Source Sequence Clustering Methods Improve the State Of the Art
Source: PubMed Central journal article supplement (PMC5069751; doi:10.1128/msystems.00003-15), 2016-02-09

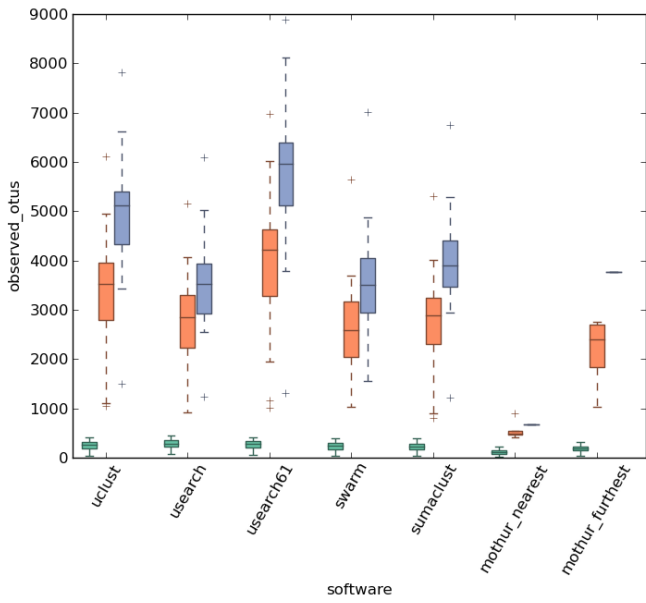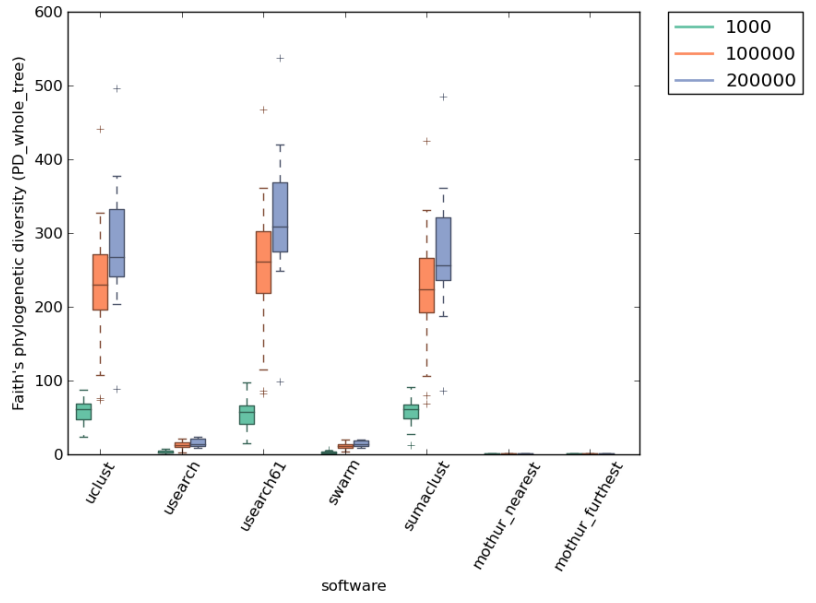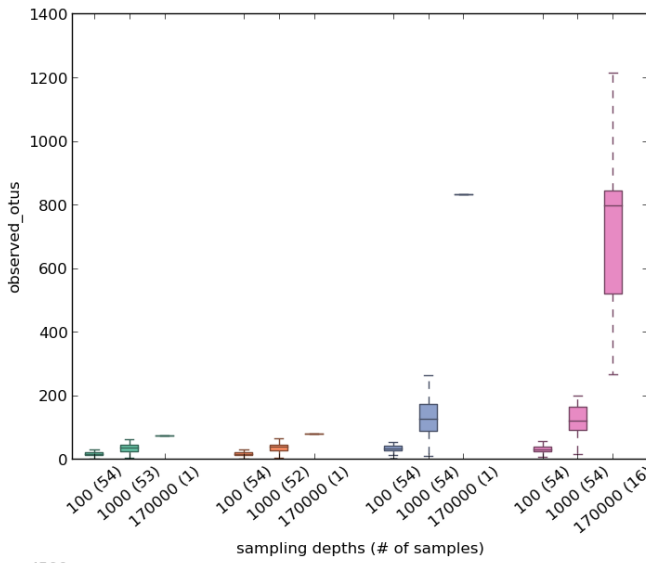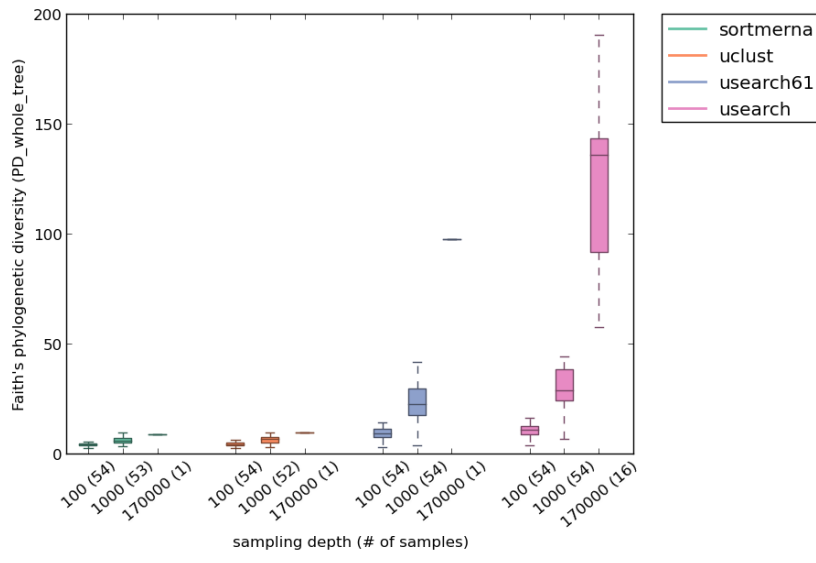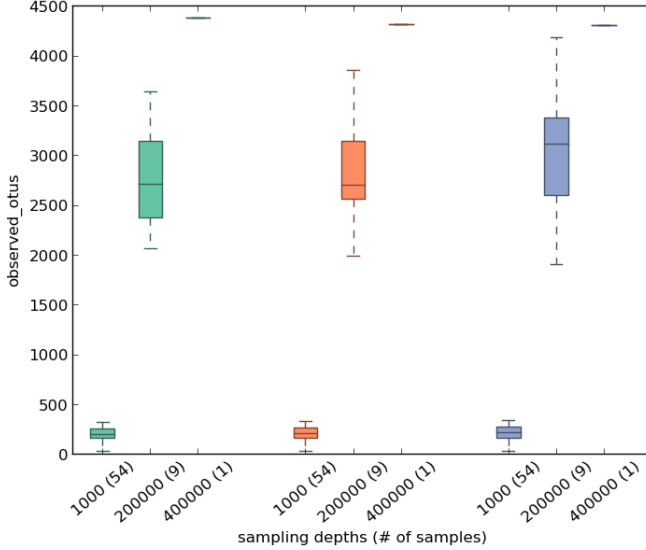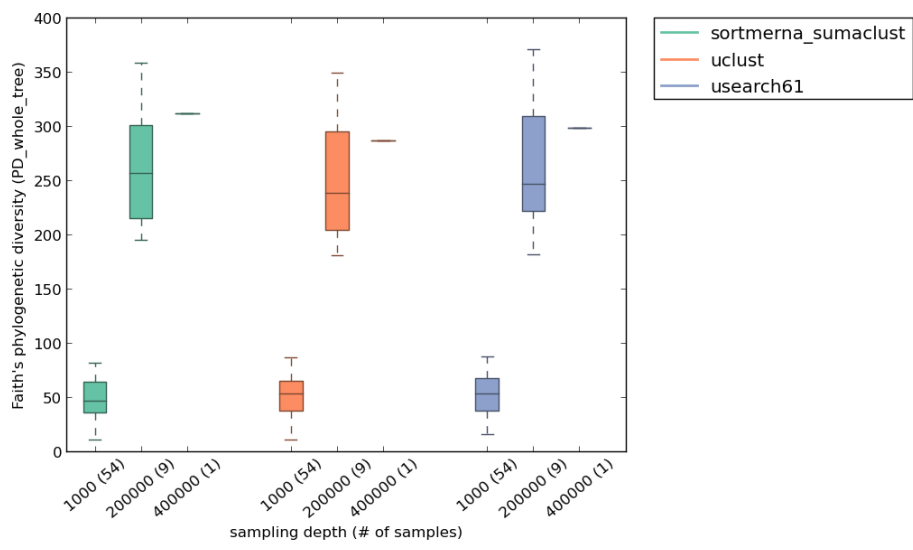

Supplement: sys001162002sf5.pdf [file sys001162002sf5.pdf]
