# Supplementary material for: Open-Source Sequence Clustering Methods Improve the State Of the Art
Source: PubMed Central journal article supplement (PMC5069751; doi:10.1128/msystems.00003-15), 2016-02-09
Supplement: sys001162002st8.pdf [file sys001162002st8.pdf]

## #Taxon

- 1 Eukaryota;\_\_Metazoa;\_\_Nematoda;\_\_Chromadorea;\_\_Aphelenchidae
- 2 Eukaryota;\_\_Metazoa;\_\_Nematoda;\_\_Enoplea;\_\_Trichodoridae
- 3 Eukaryota;\_\_Metazoa;\_\_Nematoda;\_\_Enoplea;\_\_Dorylaimidae
- 4 Eukaryota;\_\_Metazoa;\_\_Nematoda;\_\_Enoplea;\_\_Longidoridae
- 5 Eukaryota;\_\_Metazoa;\_\_Nematoda;\_\_Chromadorea;\_\_Rhabditidae
- 6 Eukaryota;\_\_Metazoa;\_\_Nematoda;\_\_Chromadorea;\_\_Hoplolaimidae
- 7 Eukaryota;\_\_Metazoa;\_\_Nematoda;\_\_Chromadorea;\_\_Aphelenchida
- 8 Eukaryota;\_\_Metazoa;\_\_Nematoda;\_\_Chromadorea;\_\_Anguinidae
- 9 Eukaryota;\_\_Metazoa;\_\_Nematoda;\_\_Chromadorea;\_\_Plectidae
- 10 Eukaryota;\_\_Metazoa;\_\_Nematoda;\_\_Chromadorea;\_\_Panagrolaimidae
- 11 Eukaryota;\_\_Metazoa;\_\_Nematoda;\_\_Chromadorea;\_\_Teratocephalidae
- 12 Eukaryota;\_\_Metazoa;\_\_Nematoda;\_\_Enoplea;\_\_Prismatolaimidae
