# Supplementary material for: Open-Source Sequence Clustering Methods Improve the State Of the Art
Source: PubMed Central journal article supplement (PMC5069751; doi:10.1128/msystems.00003-15), 2016-02-09
Supplement: sys001162002st10.pdf [file sys001162002st10.pdf]

| software                | OTUs - singletons | P    | R    | F-measure | TP | FN | FP | FP chimeric | FP known | FP other |
|-------------------------|-------------------|------|------|-----------|----|----|----|-------------|----------|----------|
| <i>de novo</i>          |                   |      |      |           |    |    |    |             |          |          |
| uparse_q3               | 29                | 0.6  | 0.75 | 0.66      | 9  | 3  | 6  | 0           | 4        | 2        |
| mothur_furthest         | 149               | 0.50 | 0.75 | 0.60      | 9  | 3  | 9  | 0           | 4        | 5        |
| usearch61               | 485               | 0.45 | 0.83 | 0.58      | 10 | 2  | 12 | 2           | 1        | 9        |
| usearch52               | 148               | 0.47 | 0.75 | 0.58      | 9  | 3  | 10 | 0           | 2        | 8        |
| swarm                   | 408               | 0.45 | 0.75 | 0.56      | 9  | 3  | 11 | 1           | 3        | 7        |
| sumaclust               | 243               | 0.4  | 0.66 | 0.5       | 8  | 4  | 12 | 2           | 3        | 7        |
| uclust                  | 365               | 0.4  | 0.66 | 0.5       | 8  | 4  | 12 | 2           | 2        | 8        |
| otuclust_q3             | 47                | 0.47 | 0.67 | 0.55      | 8  | 4  | 9  | 1           | 3        | 5        |
| otuclust_q20            | 43                | 0.47 | 0.67 | 0.55      | 8  | 4  | 9  | 1           | 3        | 5        |
| mothur_nearest          | 92                | 0.44 | 0.67 | 0.53      | 8  | 4  | 10 | 0           | 5        | 5        |
| mothur_average          | 116               | 0.44 | 0.67 | 0.53      | 8  | 4  | 10 | 0           | 6        | 4        |
| <i>closed-reference</i> |                   |      |      |           |    |    |    |             |          |          |
| sortmerna               | 70                | 0.56 | 0.75 | 0.64      | 9  | 3  | 7  | 0           | 6        | 1        |
| uclust                  | 72                | 0.56 | 0.75 | 0.64      | 9  | 3  | 7  | 0           | 5        | 2        |
| usearch61               | 70                | 0.53 | 0.66 | 0.59      | 8  | 4  | 7  | 0           | 5        | 2        |
| usearch52               | 50                | 0.5  | 0.66 | 0.57      | 8  | 4  | 8  | 0           | 1        | 7        |
| <i>open-reference</i>   |                   |      |      |           |    |    |    |             |          |          |
| sortmerna_sumaclust     | 275               | 0.47 | 0.75 | 0.58      | 9  | 3  | 10 | 1           | 2        | 7        |
| usearch61               | 328               | 0.47 | 0.75 | 0.58      | 9  | 3  | 10 | 0           | 2        | 8        |
| uclust                  | 319               | 0.42 | 0.75 | 0.54      | 9  | 3  | 12 | 1           | 2        | 9        |
